# Supplementary material
Source: publisher figshare collection journal article supplement (https://acs.figshare.com/ndownloader/files/5625246)
Supplement: Supplementary file 1 [file 5625246]

Supporting Information

**Tuning the morphology and crystal structure of  $\text{Li}_2\text{O}_2$  — A graphene  
model electrode study for Li- $\text{O}_2$  battery**

Yao Yang<sup>1,2</sup>, Tao Zhang<sup>1</sup>, Xiaochen Wang<sup>1</sup>, Linfeng Chen<sup>1</sup>, Nian Wu<sup>1</sup>, Wei Liu<sup>1</sup>,  
Hanlin Lu<sup>1</sup>, Li Xiao<sup>1\*</sup>, Lei Fu<sup>1</sup>, Lin Zhuang<sup>1</sup>

<sup>1</sup>*College of Chemistry and Molecular Sciences, Hubei Key Lab of Electrochemical Power  
Sources, Wuhan University, Wuhan 430072, China*

<sup>2</sup>*Present Address: Department of Chemistry and Chemical Biology, Cornell University,  
Ithaca, New York, 14853, USA*

\*E-mail: [chem.lily@whu.edu.cn](mailto:chem.lily@whu.edu.cn)

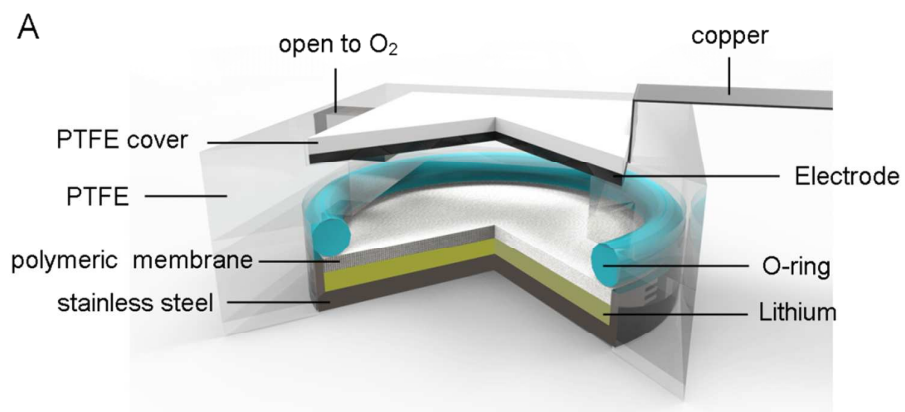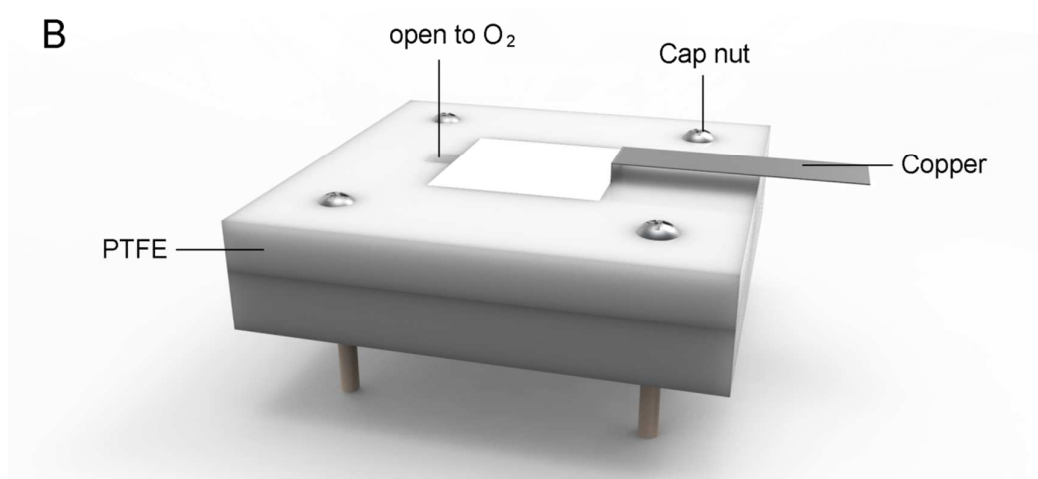

Figure S1. Schematic of the home-made electro-chemical testing device. (A) semi-transparent schematic to see the inside of the device; (B) the outside of the device.

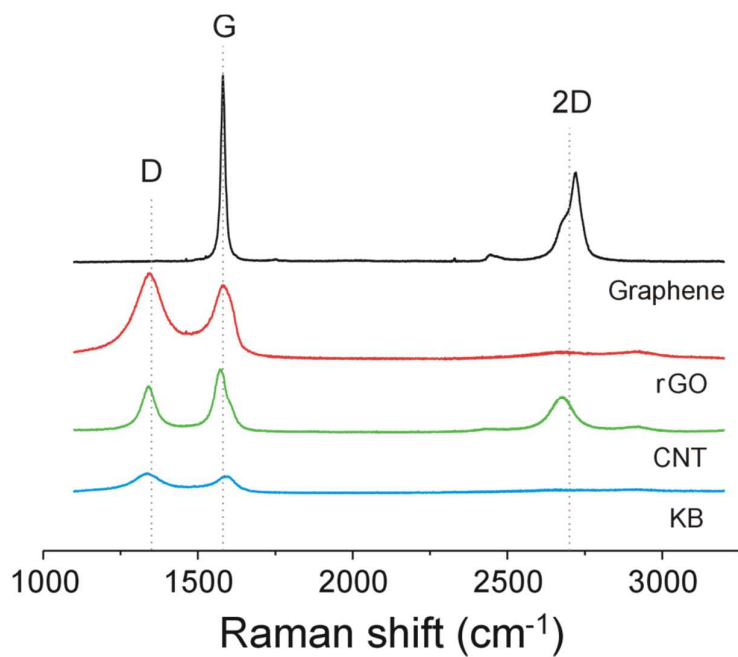

Figure S2. Confocal Raman spectra of 2D graphene, reduced graphene oxide (rGO), carbon nanotube (CNT) and Ketjen Black (KB). The peak labeled “D” is the defect peak of carbon materials, and the absence of the “D” peak in 2D graphene indicates that it has fewer defects.

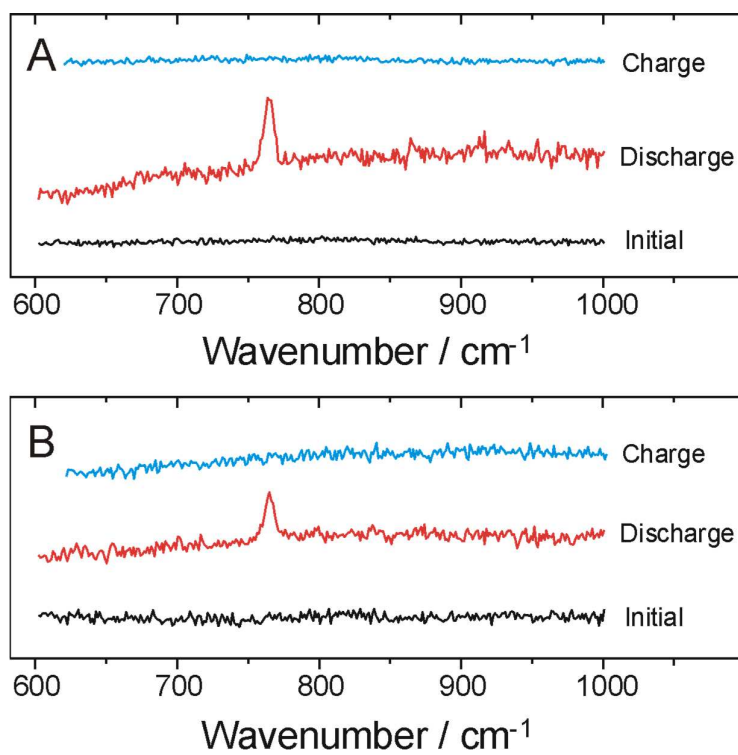

Figure S3. Confocal Raman spectra of the electrodes at different states of charge. (A) graphene electrode. (B) Pd/G electrode.
